# Supplementary material
Source: Springer Nature journal article supplement (https://www.springermedizin.de/resource/supplementary/12959_2005_44_MOESM1_ESM.doc/9569476)
Supplement: MOESM1 [file 9569476]

a

b

c

d
